# Supplementary material for: Odonate Diversity Patterns in Italy Disclose Intricate Colonization Pathways
Source: MDPI journal article supplement (doi:10.3390/biology11060886), 2022-06-08
Supplement: s1 [file s1]

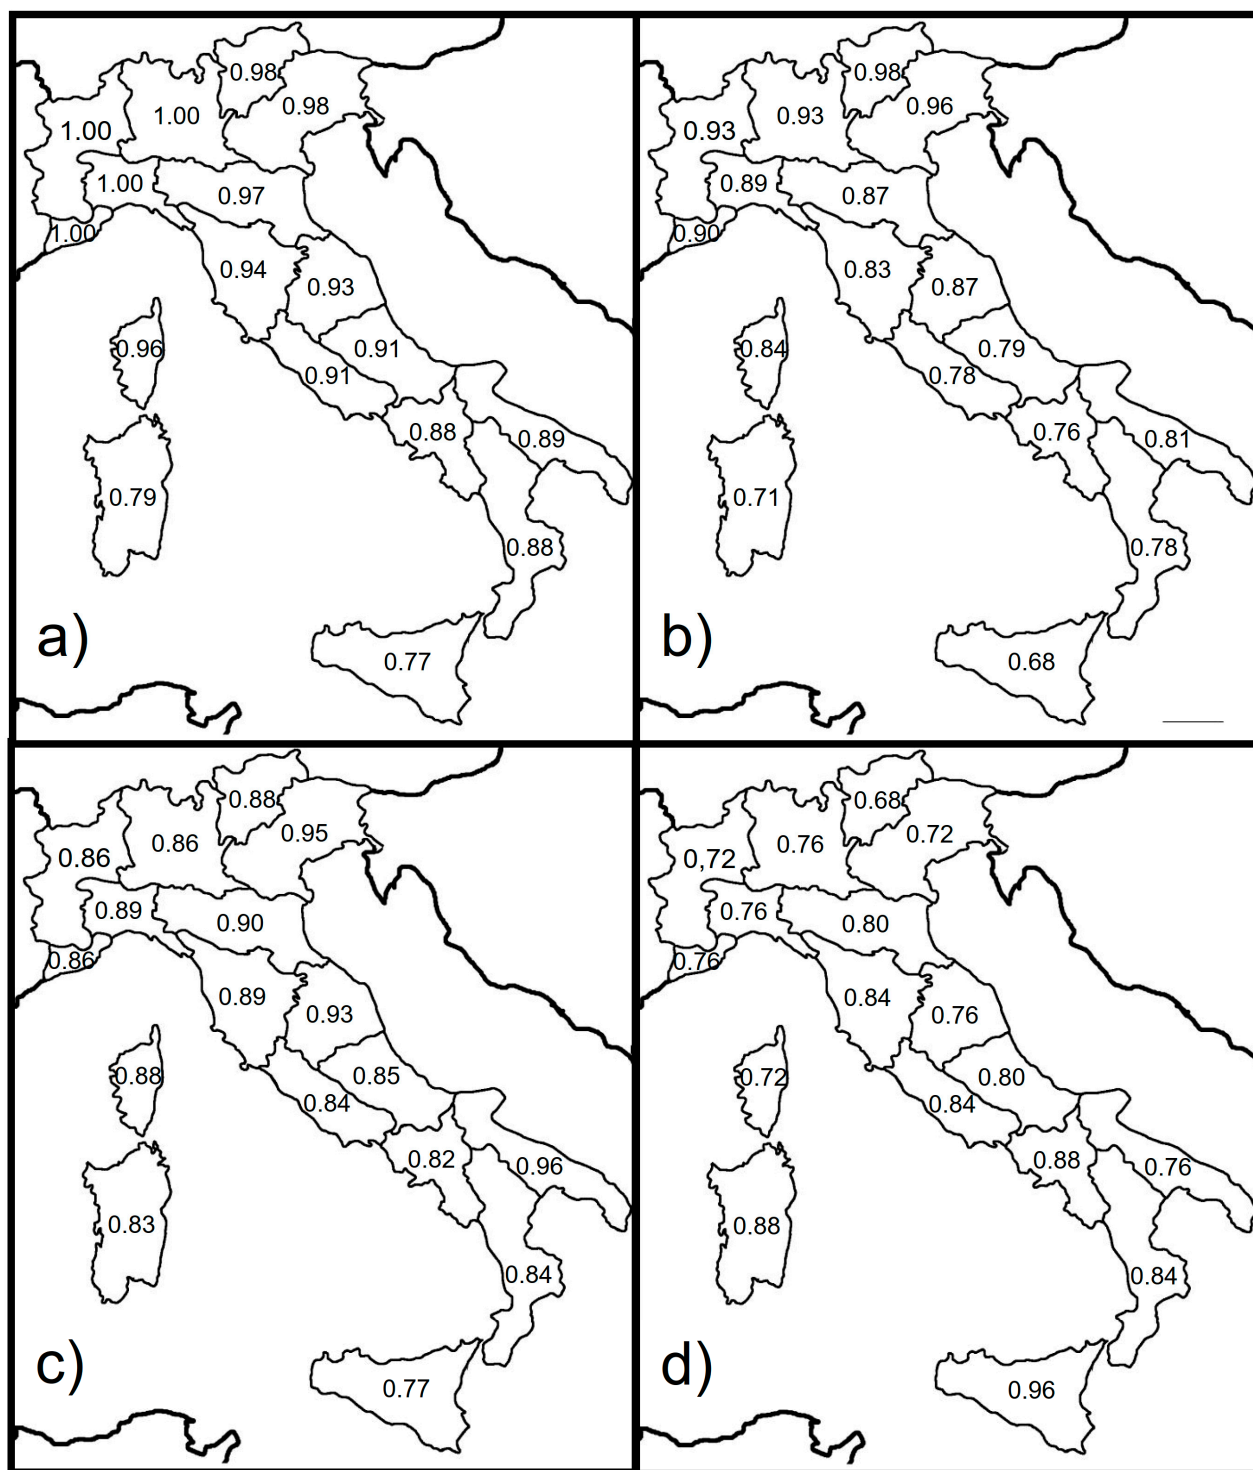

**Figure S4.** Spatial variations in the Simpson index between Italian regions and adjacent major areas for Anisoptera: (a) Western Europe; (b) Central Europe; (c) Eastern Europe; (d) Northern Africa.
